# Supplementary material for: Tectonic controls of Holocene erosion in a glaciated orogen
Source: Copernicus journal article supplement (doi:10.5194/esurf-6-595-2018), 2018-07-26
Supplement: Supplementary file 1 [file esurf-6-595-2018-supplement.pdf]

Supplement of Earth Surf. Dynam., 6, 595–610, 2018  
<https://doi.org/10.5194/esurf-6-595-2018-supplement>  
© Author(s) 2018. This work is distributed under  
the Creative Commons Attribution 4.0 License.

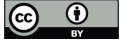

*Supplement of*

## **Tectonic controls of Holocene erosion in a glaciated orogen**

**Byron A. Adams and Todd A. Ehlers**

*Correspondence to:* Byron A. Adams ([byron.adams@bristol.ac.uk](mailto:byron.adams@bristol.ac.uk))

The copyright of individual parts of the supplement might differ from the CC BY 4.0 License.

**This PDF file includes:**

Fig. S1. Basin sample location map.

Fig. S2. Comparison of basin-averaged erosion rates and equilibrium line altitudes (ELA).

Calculation of snow depth estimations.

Fig. S3. Monthly estimated snow depth map.

Fig. S4. Mean monthly snow depth measurements from the Buckinghorse SNOTEL meteorological station.

Table S1. Laboratory and isotopic data for new Olympic Mountain samples.

Table S2. Blank data for new Olympic Mountain samples.

Table S3. Shielding and erosion rate comparisons.

References

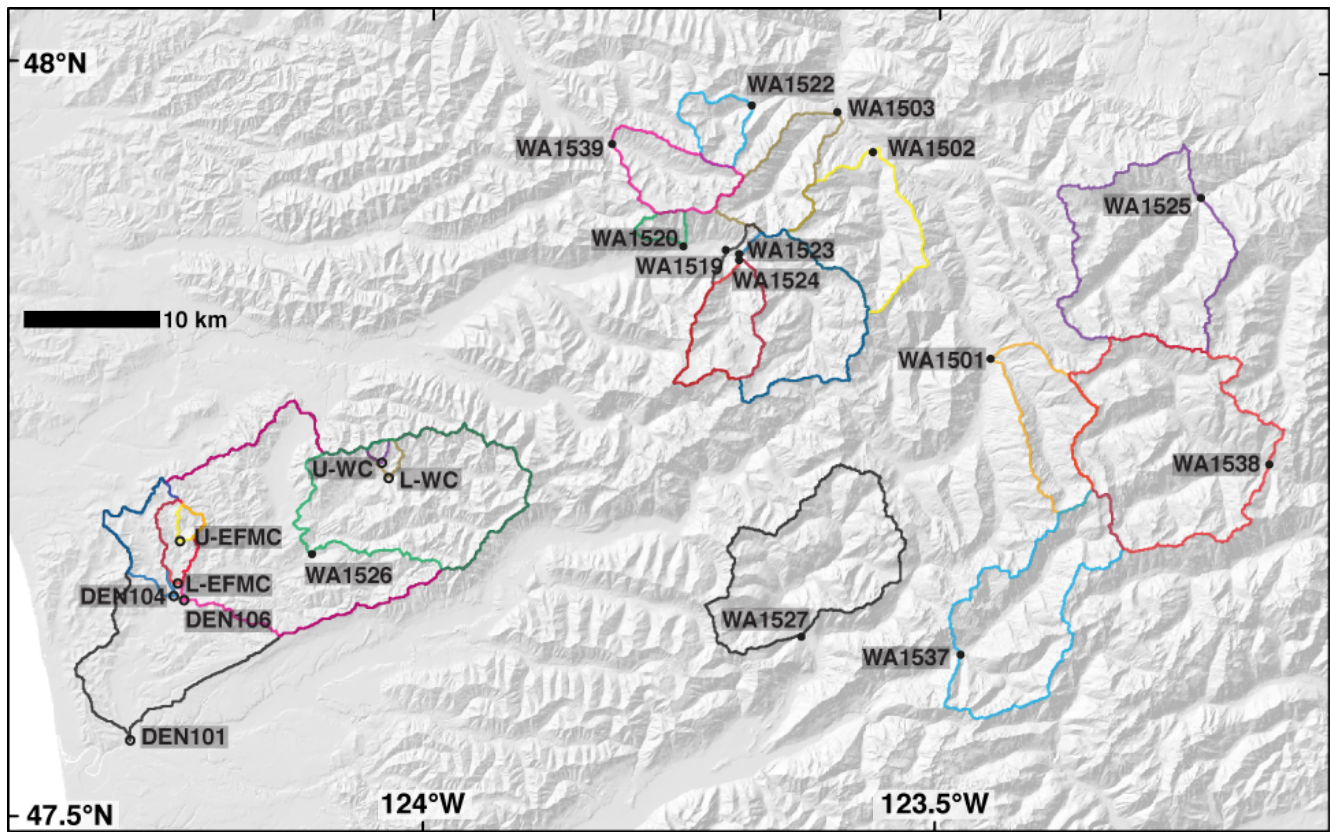

Figure S1. Basin sample location map. Samples marked with open circles are from Belmont et al. (2007).

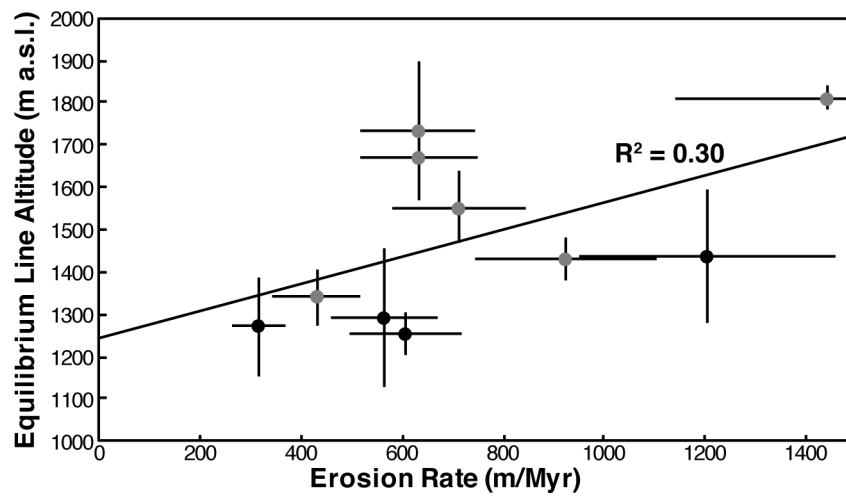

Figure S2. Comparison of basin-averaged erosion rates and equilibrium line altitudes. Black and grey data are from the west and east sides of the range, respectively.

### **Calculation of snow depth estimations**

For this study, we utilized the MODIS/Terra Snow Cover Monthly L3 Global 0.05°, Version 6 dataset (Hall and Riggs, 2015), to estimate the distribution of snow for a given month. For any given pixel in the scene the value can vary between 0 and 100. While we consider these values to be spatially accurate they are only qualitative in that they do not have a magnitude equal to a physical dimension. To scale these data to represent snow depth values, we consider the snow cover values to be analogous to a percentage of the maximum snow depth in the Olympic Mountain range.

Our best estimate of maximum snow depth in the range comes from the Buckinghorse SNOTEL meteorological station (<https://www.ncdc.noaa.gov/cdo-web/datasets/>; Network ID: GHCND:USS0023B18S), located at 1484 m a.s.l. in the southern reaches of the Elwha Valley in the core of the range (Figs. S43 and S4). This station records the highest monthly snow depth measurements within the range. In the final step, we smoothed mean monthly snow cover data (2001-2015) using a bilinear algorithm and multiplied these percentages by the mean monthly snow depth station data (2009-2015). We do not assert that the resulting maps (Fig. S3) are completely accurate. However, we have calculated them to constrain the possible effect snow shielding may have on the calculation of erosion rates across the range. We assume a snow density of  $0.25 \text{ g/cm}^3$  for shielding calculations.

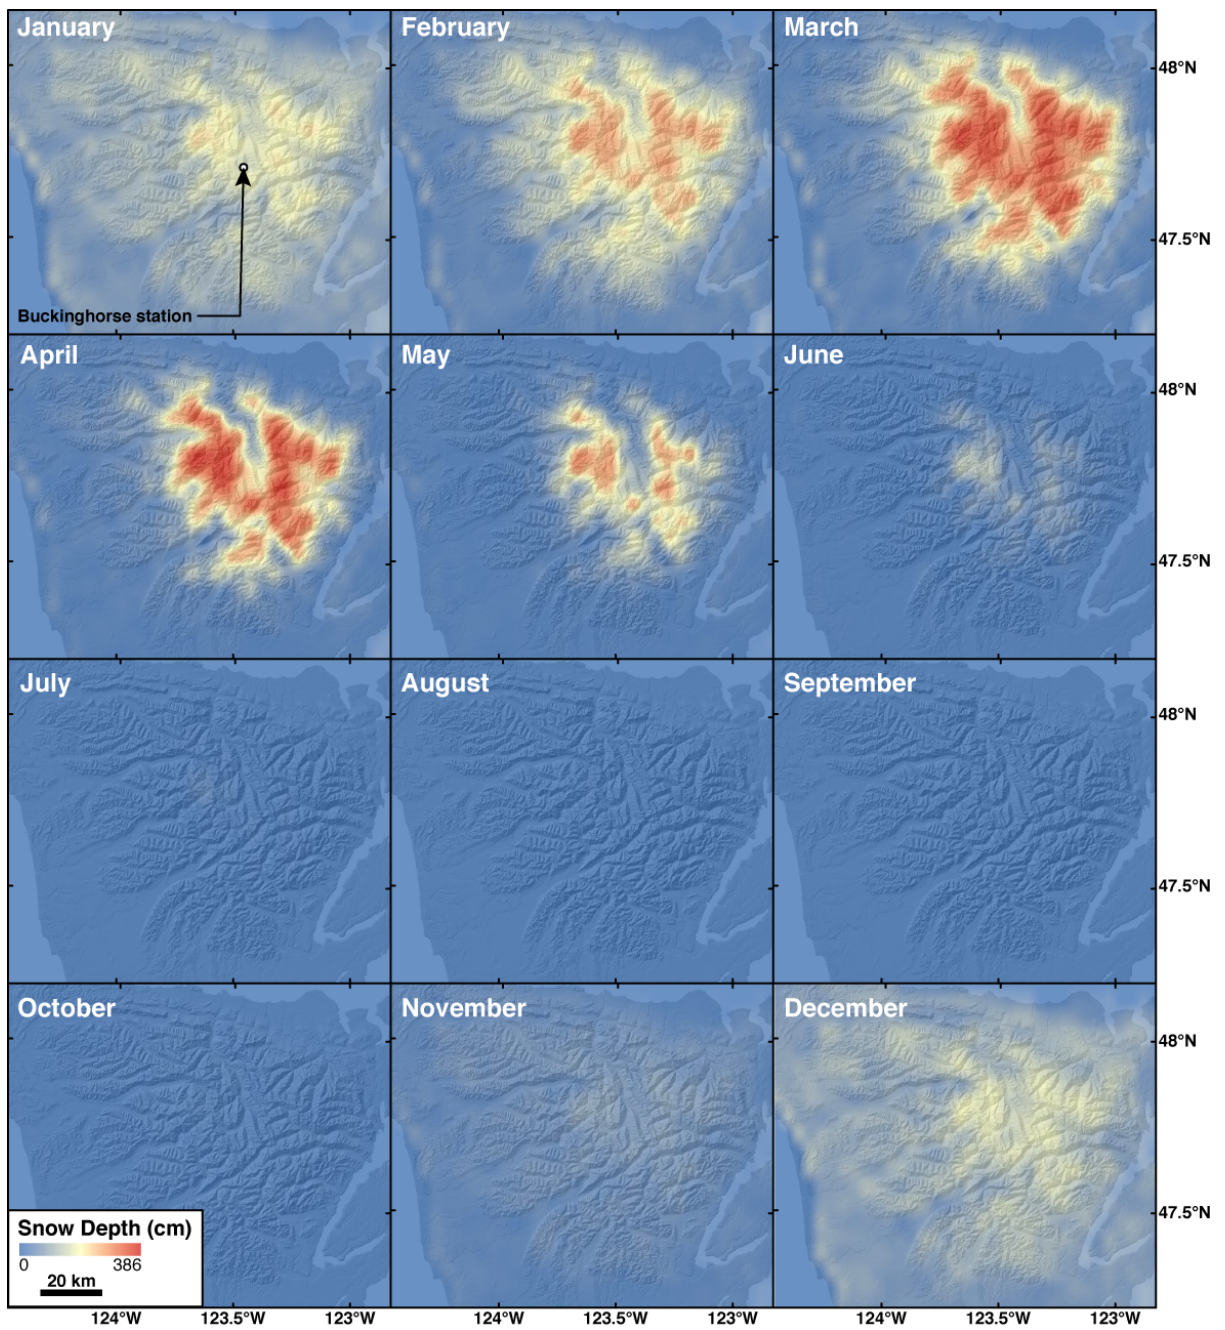

**Figure S3. Monthly estimated snow depth map.** The dot marks the position of the Buckinghamhorse SNOTEL meteorological station.

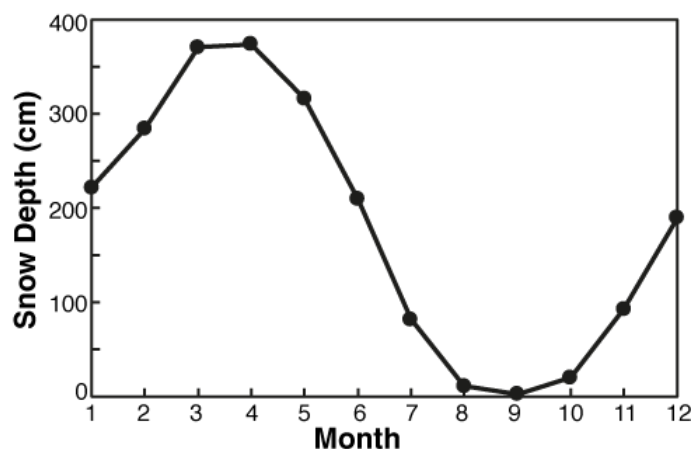

Figure S4. Mean monthly snow depth measurements from the Buckinghorse SNOTEL meteorological station. These means are calculated for the years 2009-2015.

Table S1. Laboratory and isotopic data for new Olympic Mountain samples.

| Sample Name | Effective Latitude (°N) | Centroid Longitude (°E) | Effective Elevation (m a.s.l.) | Quartz (g) | Be from spike (g) | Total Al from ICP (g) | Laboratory Be Number | $^{10}\text{Be}/\text{Be}$ from AMS | $^{10}\text{Be}/\text{Be}$ 1 $\sigma$ | Be Blank Used | Laboratory Al Number | $^{26}\text{Al}/^{27}\text{Al}$ from AMS | $^{26}\text{Al}/^{27}\text{Al}$ 1 $\sigma$ | Al Blank Used |
|-------------|-------------------------|-------------------------|--------------------------------|------------|-------------------|-----------------------|----------------------|-------------------------------------|---------------------------------------|---------------|----------------------|------------------------------------------|--------------------------------------------|---------------|
| WA1501      | 47.761893               | -123.38950              | 1397                           | 90.382     | 3.29E-04          | 9.2640E-03            | s09728               | 5.0260E-14                          | 2.5300E-15                            | BA10          | s09935               | 3.257E-14                                | 2.850E-15                                  | BA11          |
| WA1502      | 47.856058               | -123.57330              | 1266                           | 88.882     | 3.29E-04          | 1.8151E-02            | s09729               | 3.9650E-14                          | 2.0600E-15                            | BA10          | s09939               | 1.065E-14                                | 1.500E-15                                  | BA11          |
| WA1503      | 47.96357                | -123.65440              | 1195                           | 88.350     | 3.28E-04          | 1.6448E-02            | s09730               | 2.9910E-14                          | 1.7300E-15                            | BA10          | s09943               | 9.386E-15                                | 1.400E-15                                  | BA11          |
| WA1519      | 47.86627                | -123.65900              | 1421                           | 90.386     | 3.28E-04          | 1.6600E-02            | s09731               | 1.4260E-14                          | 1.1200E-15                            | BA10          | s09947               | 2.660E-15                                | 7.420E-16                                  | BA11          |
| WA1520      | 47.902426               | -123.77010              | 1184                           | 81.778     | 3.27E-04          | 2.0658E-02            | s09732               | 4.2830E-14                          | 2.1100E-15                            | BA10          | s09951               | 1.303E-14                                | 1.670E-15                                  | BA11          |
| WA1522      | 47.977417               | -123.71920              | 1252                           | 51.239     | 3.26E-04          | 6.1441E-03            | s09046               | 3.8700E-14                          | 2.5800E-15                            | BA1           | s10020               | 5.012E-14                                | 3.490E-15                                  | BA3           |
| WA1523      | 47.89053                | -123.63360              | 1404                           | 73.762     | 3.28E-04          | 9.1110E-03            | s09733               | 1.4880E-14                          | 1.0900E-15                            | BA10          | s09955               | 3.876E-15                                | 8.750E-16                                  | BA11          |
| WA1524      | 47.832887               | -123.70770              | 1505                           | 99.716     | 3.47E-04          | 1.8004E-02            | s09739               | 1.3250E-14                          | 1.0000E-15                            | BA19          | s09980               | 5.430E-15                                | 1.010E-15                                  | BA20          |
| WA1525      | 47.862877               | -123.29530              | 1547                           | 84.053     | 3.27E-04          | 1.0421E-02            | s09735               | 2.3580E-14                          | 1.4600E-15                            | BA10          | s09967               | 9.652E-15                                | 1.450E-15                                  | BA11          |
| WA1526      | 47.674477               | -124.01220              | 550                            | 99.299     | 3.28E-04          | 2.1568E-02            | s09734               | 9.1580E-14                          | 3.7000E-15                            | BA10          | s09959               | 2.296E-14                                | 2.280E-15                                  | BA11          |
| WA1527      | 47.616827               | -123.62340              | 1100                           | 92.130     | 3.27E-04          | 1.9201E-02            | s09735               | 4.8860E-14                          | 2.4200E-15                            | BA19          | s09976               | 1.731E-14                                | 1.810E-15                                  | BA20          |
| WA1537      | 47.70025                | -123.41140              | 1147                           | 94.016     | 3.48E-04          | 8.3440E-03            | s09740               | 2.2430E-14                          | 1.4400E-15                            | BA19          | s09984               | 1.722E-14                                | 1.920E-15                                  | BA20          |
| WA1538      | 47.72078                | -123.27090              | 1439                           | 95.680     | 3.48E-04          | 1.0705E-02            | s09741               | 5.0490E-14                          | 2.3900E-15                            | BA19          | s09988               | 2.849E-14                                | 2.450E-15                                  | BA20          |
| WA1539      | 47.917853               | -123.76290              | 1238                           | 92.504     | 3.48E-04          | 1.4970E-02            | s09742               | 8.6810E-14                          | 3.5100E-15                            | BA19          | s09992               | 4.037E-14                                | 3.120E-15                                  | BA20          |

Table S2. Blank data for new Olympic Mountain samples.

| Blank Name | Laboratory Be Number | Be from spike (g) | $^{10}\text{Be}/\text{Be}$ from AMS | $^{10}\text{Be}/\text{Be}$ 1 $\sigma$ | Be Standard | Laboratory Al Number | Al from spike (g) | $^{26}\text{Al}/^{27}\text{Al}$ from AMS | $^{26}\text{Al}/^{27}\text{Al}$ 1 $\sigma$ | Al Standard |
|------------|----------------------|-------------------|-------------------------------------|---------------------------------------|-------------|----------------------|-------------------|------------------------------------------|--------------------------------------------|-------------|
| BA1        | s09045               | 3.2750E-04        | 1.8410E-15                          | 4.9500E-16                            | 07KNSTD     | --                   | --                | --                                       | --                                         | --          |
| BA10       | s09737               | 3.2739E-04        | 1.9620E-15                          | 3.6900E-16                            | 07KNSTD     | --                   | --                | --                                       | --                                         | --          |
| BA19       | s09746               | 3.4758E-04        | 2.1870E-15                          | 4.2600E-16                            | 07KNSTD     | --                   | --                | --                                       | --                                         | --          |
| BA3        | --                   | --                | --                                  | --                                    | --          | s10024               | 2.5761E-03        | 1.647E-15                                | 1.028E-15                                  | KNSTD       |
| BA11       | --                   | --                | --                                  | --                                    | --          | s09967               | 2.5512E-03        | 1.905E-16                                | 6.079E-16                                  | KNSTD       |
| BA20       | --                   | --                | --                                  | --                                    | --          | s10008               | 2.5582E-03        | 2.077E-16                                | 6.176E-16                                  | KNSTD       |

**Table S3. Shielding and erosion rate comparisons.**

| Sample Name | Topographic Shielding | Snow/Ice Shielding | Total Shielding | Topo+Snow Erosion Rate (m/Myr) | Erosion Rate $2\sigma$ (m/Myr) | Topo Only Erosion Rate (m/Myr) | Erosion Rate $2\sigma$ (m/Myr) | Percent Difference (%) |
|-------------|-----------------------|--------------------|-----------------|--------------------------------|--------------------------------|--------------------------------|--------------------------------|------------------------|
| WA1501      | 0.95                  | 0.87               | 0.82            | 638                            | 118                            | 726                            | 136                            | 12                     |
| WA1502      | 0.96                  | 0.85               | 0.80            | 718                            | 134                            | 842                            | 160                            | 15                     |
| WA1503      | 0.95                  | 0.86               | 0.81            | 930                            | 183                            | 1068                           | 212                            | 13                     |
| WA1519      | 0.95                  | 0.85               | 0.80            | 2511                           | 618                            | 2922                           | 725                            | 14                     |
| WA1520      | 0.94                  | 0.90               | 0.85            | 610                            | 112                            | 666                            | 123                            | 8                      |
| WA1522      | 0.95                  | 0.87               | 0.82            | 432                            | 90                             | 492                            | 103                            | 12                     |
| WA1523      | 0.95                  | 0.83               | 0.78            | 1881                           | 442                            | 2238                           | 265                            | 16                     |
| WA1524      | 0.94                  | 0.87               | 0.81            | 3117                           | 782                            | 3558                           | 898                            | 12                     |
| WA1525      | 0.95                  | 0.85               | 0.80            | 1451                           | 301                            | 1691                           | 355                            | 14                     |
| WA1526      | 0.97                  | 0.96               | 0.92            | 224                            | 37                             | 235                            | 39                             | 4                      |
| WA1527      | 0.95                  | 0.87               | 0.82            | 564                            | 104                            | 622                            | 115                            | 9                      |
| WA1537      | 0.93                  | 0.86               | 0.79            | 1213                           | 256                            | 1396                           | 297                            | 13                     |
| WA1538      | 0.95                  | 0.84               | 0.79            | 635                            | 116                            | 748                            | 138                            | 15                     |
| WA1539      | 0.96                  | 0.87               | 0.83            | 318                            | 55                             | 361                            | 63                             | 12                     |
| U-EFMC      | 0.98                  | 0.97               | 0.95            | 171                            | 34                             | 176                            | 35                             | 2                      |
| L-EFMC      | 0.98                  | 0.97               | 0.96            | 129                            | 20                             | 131                            | 20                             | 2                      |
| U-WC        | 0.97                  | 0.96               | 0.93            | 158                            | 25                             | 164                            | 26                             | 4                      |
| L-WC        | 0.98                  | 0.96               | 0.93            | 199                            | 31                             | 207                            | 32                             | 4                      |
| DEN104      | 0.99                  | 0.97               | 0.96            | 114                            | 43                             | 117                            | 44                             | 2                      |
| DEN106      | 0.97                  | 0.96               | 0.93            | 237                            | 110                            | 246                            | 114                            | 3                      |
| DEN101      | 0.98                  | 0.96               | 0.94            | 223                            | 176                            | 231                            | 182                            | 3                      |

**References**

Belmont, P., Pazzaglia, F., and Gosse, J. C.: Cosmogenic  $^{10}\text{Be}$  as a tracer for hillslope and channel sediment dynamics in the Clearwater River, western Washington State, *Earth and Planetary Science Letters*, 264, 123-135, 2007.

Hall, D., and Riggs, G.: MODIS/Terra snow cover Monthly L3 Global 0.05Deg CMG, Version 6. In: NASA National Snow and Ice Data Center, Distributed Active Center, Boulder, Colorado, USA, 2015.
